# Supplementary material for: Synthesis, structures and magnetic properties of a series of 3d-4f tetranuclear CoII2LnIII2 cubanes
Source: Royal Society of Chemistry journal article supplement (doi:10.1039/c002841j), 2010-01-01
Supplement: c002841j.pdf [file c002841j.pdf]

## Supporting Information

### Synthesis, Structures and Magnetic properties of a series of 3d-4f tetranuclear $\text{Co}^{\text{II}}_2\text{Ln}^{\text{III}}_2$ Cubane

Xiao-Qing Zhao,<sup>†,‡</sup> Yanhua Lan,<sup>†</sup> Bin Zhao,<sup>‡</sup> Peng Cheng,<sup>\*,‡</sup> Christopher E. Anson,<sup>†</sup>  
Annie K. Powell<sup>\*,†</sup>

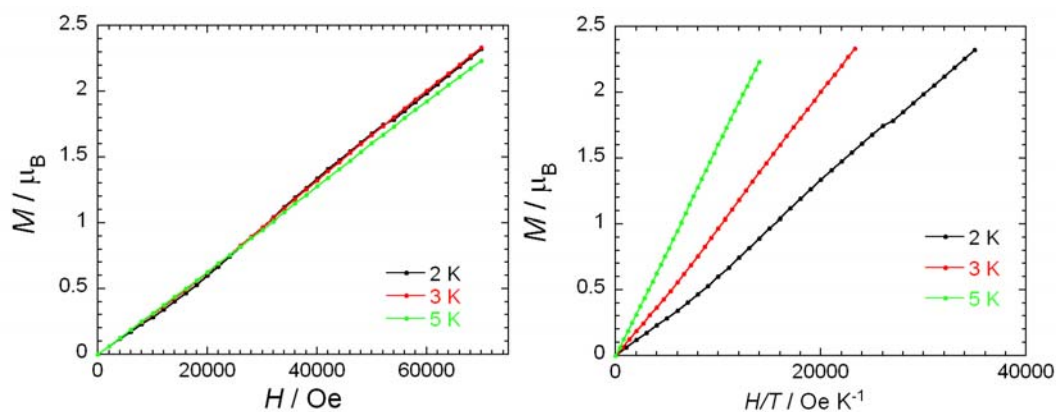

**Figure S1.** Field dependence of the magnetization of complex for 1.

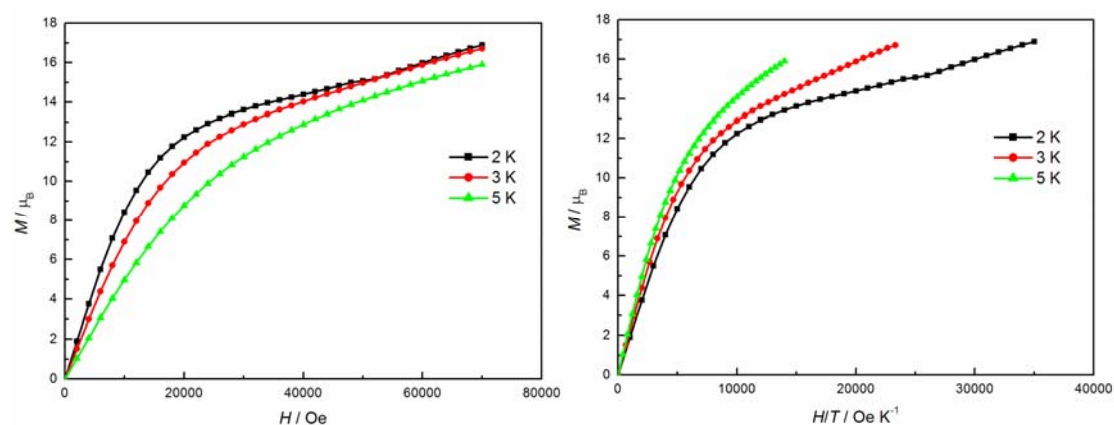

**Figure S2.** Field dependence of the magnetization of complex for 2.

\* To whom correspondence should be addressed. E-mail: pcheng@nankai.edu.cn (P. C.);  
powell@ioc.uni-karlsruhe.de (A.K.P.).

<sup>†</sup> Universität Karlsruhe

<sup>‡</sup> Nankai University

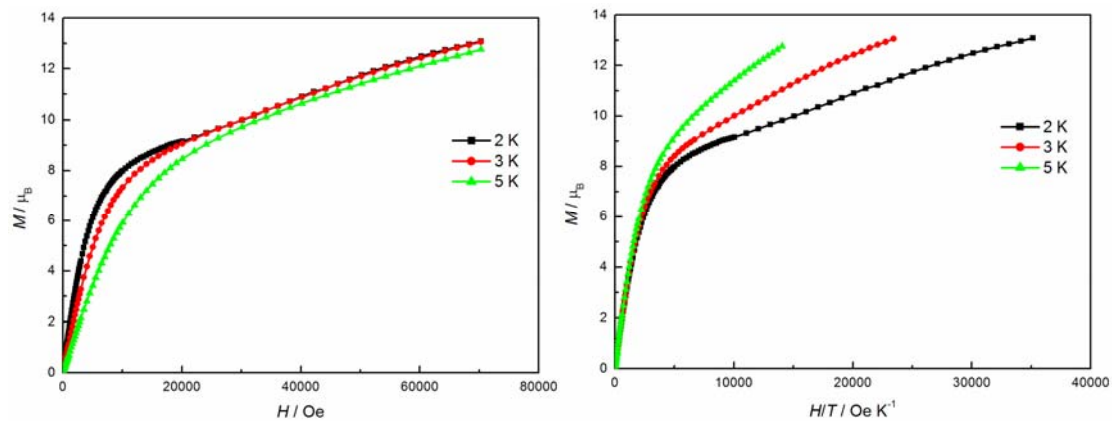

**Figure S3.** Field dependence of the magnetization of complex for 3.

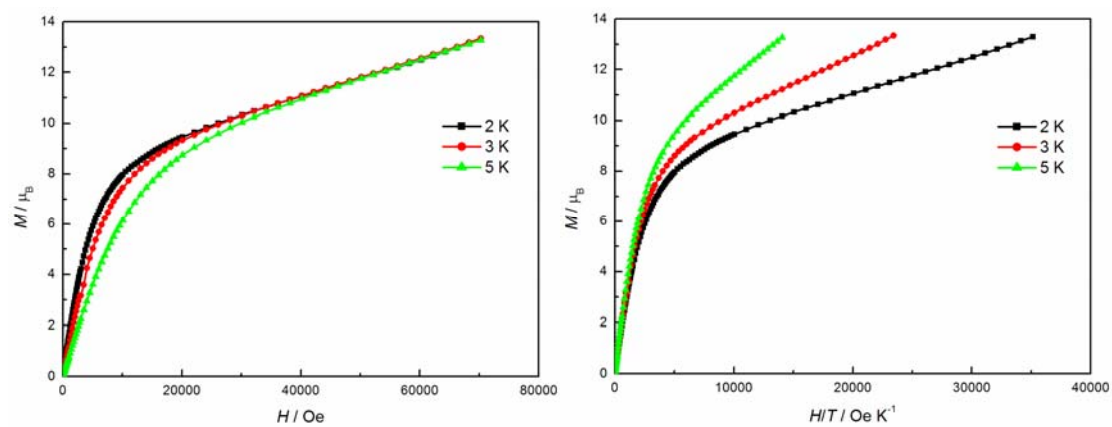

**Figure S4.** Field dependence of the magnetization of complex for 4.

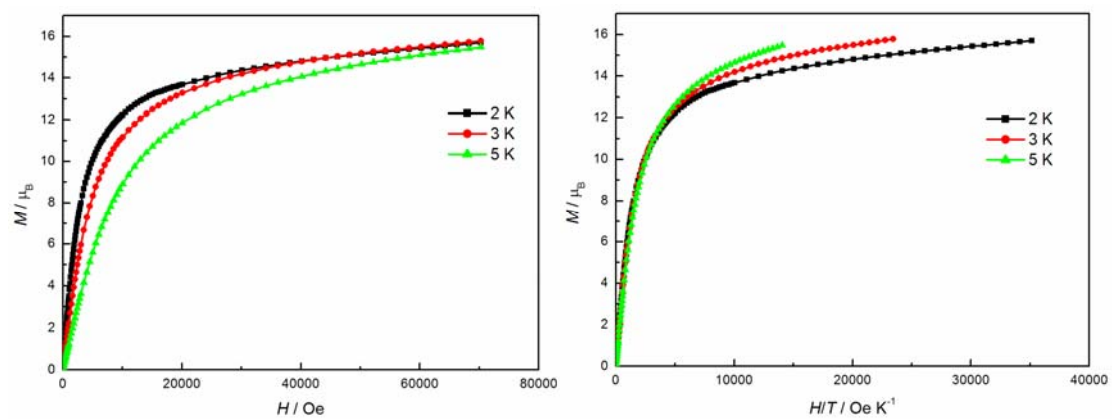

**Figure S5.** Field dependence of the magnetization of complex for 5.
